# Supplementary material
Source: publisher figshare collection journal article supplement (https://acs.figshare.com/ndownloader/files/4230784)
Supplement: Supplementary file 1 [file 4230784]

## Supporting Information

### Effects of Phosphate on the Transport of *Escherichia coli* O157:H7 in Saturated Quartz Sand

*Lixia Wang,<sup>†</sup> Shangping Xu,<sup>‡</sup> Jin Li,<sup>\*</sup>*

<sup>†</sup> Department of Civil Engineering and Mechanics, University of Wisconsin-Milwaukee,  
Milwaukee, WI 53201, United States

<sup>‡</sup> Department of Geosciences, University of Wisconsin-Milwaukee,  
Milwaukee, WI 53201, United States

Pages: 3

Table: 1

## The calculated collision efficiency ( $\alpha$ )

According to the colloid filtration theory, the deposition rate coefficients is a function of the collector efficiency ( $\eta$ ) and collision efficiency ( $\alpha$ ) [S1,S2]. The collector efficiency ( $\eta$ ) can be estimated from correlation equation reported in the literature (Table S1) [S2]. The collision efficiency ( $\alpha$ ) can then be estimated from the experimentally determined deposition rate coefficient and collector efficiency [S2]:

$$\alpha = \frac{2}{3} k_d \frac{d_c \varepsilon}{U \eta (1 - \varepsilon)}$$

where  $d_c$  is the minimum of the grain size weight distribution,  $\varepsilon$  is the porosity of the sand,  $U$  is the specific discharge. The calculated values of  $\alpha$  for the *E. coli* O157:H7 cells under various chemistry conditions are listed in Table S1.

**Table S1.** Values of collision efficiency ( $\alpha$ ) for the *E. coli* O157:H7 cells under various chemistry conditions.

| Phosphate concentration | $\eta$ |        | $\alpha$ |        |
|-------------------------|--------|--------|----------|--------|
|                         | 10 mM  | 100 mM | 10 mM    | 100 mM |
| 0 mM                    | 0.4541 | 0.4771 | 0.314    | 0.139  |
| 0.1 mM                  | 0.4434 | 0.4818 | 0.150    | 0.110  |
| 1 mM                    | 0.4742 | 0.4597 | 0.104    | 0.029  |

## Literature Cited:

- S1. Yao, K.M., M.M. Habibian, and C.R. Omelia, *Water and waste water filtration - concepts and applications*. Environmental Science & Technology, 1971. **5**(11): p. 1105-1112.
- S2. Tufenkji, N. and M. Elimelech, *Correlation equation for predicting single-collector efficiency in physicochemical filtration in saturated porous media*. Environmental Science & Technology, 2004. **38**(2): p. 529-536.
